# Supplementary material
Source: MDPI journal article supplement (https://www.mdpi.com/2073-4433/5/3/473)
Supplement: s1 [file s1]

## Sheet: Sheet1
Wavenumber	Absorption	Absorption	Absorption		Cross Sections in cm2 molecule-1				All pure gas (ie no air) at 295 K
(cm-1)	CFC-113	HFC-133a	CFC112/112a		2.7 Torr of CFC-113a		6.96 Torr of HCFC-133a			8.1 Torr of a 90.8%/9.2% mixture of CFC-112/112a at 295 K
690.01	0	0	0
690.02	0	0	0
690.03	0	0	0
690.04	0	0	0
690.05	0	0	0
690.06	0	0	0
690.07	0	0	0
690.08	0	0	0
690.09	0	0	0
690.1	0	0	0
690.11	0	0	0
690.12	0	0	0
690.13	0	0	0
690.14	0	0	0
690.15	0	0	0
690.16	0	0	0
690.17	0	0	0
690.18	0	0	0
690.19	0	0	0
690.2	0	0	0
690.21	0	0	0
690.22	0	0	0
690.23	0	0	0
690.24	0	0	0
690.25	0	0	0
690.26	0	0	0
690.27	0	0	0
690.28	0	0	0
690.29	0	0	0
690.3	0	0	0
690.31	0	0	0
690.32	0	0	0
690.33	0	0	0
690.34	0	0	0
690.35	0	0	0
690.36	0	0	0
690.37	0	0	0
690.38	0	0	0
690.39	0	0	0
690.4	0	0	0
690.41	0	0	0
690.42	0	0	0
690.43	0	0	0
690.44	0	0	0
690.45	0	0	0
690.46	0	0	0
690.47	0	0	0
690.48	0	0	0
690.49	0	0	0
690.5	0	0	0
690.51	0	0	0
690.52	0	0	0
690.53	0	0	0
690.54	0	0	0
690.55	0	0	0
690.56	0	0	0
690.57	0	0	0
690.58	0	0	0
690.59	0	0	0
690.6	0	0	0
690.61	0	0	0
690.62	0	0	0
690.63	0	0	0
690.64	0	0	0
690.65	0	0	0
690.66	0	0	0
690.67	0	0	0
690.68	0	0	0
690.69	0	0	0
690.7	0	0	0
690.71	0	0	0
690.72	0	0	0
690.73	0	0	0
690.74	0	0	0
690.75	0	0	0
690.76	0	0	0
690.77	0	0	0
690.78	0	0	0
690.79	0	0	0
690.8	0	0	0
690.81	0	0	0
690.82	0	0	0
690.83	0	0	0
690.84	0	0	0
690.85	0	0	0
690.86	0	0	0
690.87	0	0	0
690.88	0	0	0
690.89	0	0	0
690.9	0	0	0
690.91	0	0	0
690.92	0	0	0
690.93	0	0	0
690.94	0	0	0
690.95	0	0	0
690.96	0	0	0
690.97	0	0	0
690.98	0	0	0
690.99	0	0	0
691	0	0	0
691.01	0	0	0
691.02	0	0	0
691.03	0	0	0
691.04	0	0	0
691.05	0	0	0
691.06	0	0	0
691.07	0	0	0
691.08	0	0	0
691.09	0	0	0
691.1	0	0	0
691.11	0	0	0
691.12	0	0	0
691.13	0	0	0
691.14	0	0	0
691.15	0	0	0
691.16	0	0	0
691.17	0	0	0
691.18	0	0	0
691.19	0	0	0
691.2	0	0	0
691.21	0	0	0
691.22	0	0	0
691.23	0	0	0
691.24	0	0	0
691.25	0	0	0
691.26	0	0	0
691.27	0	0	0
691.28	0	0	0
691.29	0	0	0
691.3	0	0	0
691.31	0	0	0
691.32	0	0	0
691.34	0	0	0
691.35	0	0	0
691.36	0	0	0
691.37	0	0	0
691.38	0	0	0
691.39	0	0	0
691.4	0	0	0
691.41	0	0	0
691.42	0	0	0
691.43	0	0	0
691.44	0	0	0
691.45	0	0	0
691.46	0	0	0
691.47	0	0	0
691.48	0	0	0
691.49	0	0	0
691.5	0	0	0
691.51	0	0	0
691.52	0	0	0
691.53	0	0	0
691.54	0	0	0
691.55	0	0	0
691.56	0	0	0
691.57	0	0	0
691.58	0	0	0
691.59	0	0	0
691.6	0	0	0
691.61	0	0	0
691.62	0	0	0
691.63	0	0	0
691.64	0	0	0
691.65	0	0	0
691.66	0	0	0
691.67	0	0	0
691.68	0	0	0
691.69	0	0	0
691.7	0	0	0
691.71	0	0	0
691.72	0	0	0
691.73	0	0	0
691.74	0	0	0
691.75	0	0	0
691.76	0	0	0
691.77	0	0	0
691.78	0	0	0
691.79	0	0	0
691.8	0	0	0
691.81	0	0	0
691.82	0	0	0
691.83	0	0	0
691.84	0	0	0
691.85	0	0	0
691.86	0	0	0
691.87	0	0	0
691.88	0	0	0
691.89	0	0	0
691.9	0	0	0
691.91	0	0	0
691.92	0	0	0
691.93	0	0	0
691.94	0	0	0
691.95	0	0	0
691.96	0	0	0
691.97	0	0	0
691.98	0	0	0
691.99	0	0	0
692	0	0	0
692.01	0	0	0
692.02	0	0	0
692.03	0	0	0
692.04	0	0	0
692.05	0	0	0
692.06	0	0	0
692.07	0	0	0
692.08	0	0	0
692.09	0	0	0
692.1	0	0	0
692.11	0	0	0
692.12	0	0	0
692.13	0	0	0
692.14	0	0	0
692.15	0	0	0
692.16	0	0	0
692.17	0	0	0
692.18	0	0	0
692.19	0	0	0
692.2	0	0	0
692.21	0	0	0
692.22	0	0	0
692.23	0	0	0
692.24	0	0	0
692.25	0	0	0
692.26	0	0	0
692.27	0	0	0
692.28	0	0	0
692.29	0	0	0
692.3	0	0	0
692.31	0	0	0
692.32	0	0	0
692.33	0	0	0
692.34	0	0	0
692.35	0	0	0
692.36	0	0	0
692.37	0	0	0
692.38	0	0	0
692.39	0	0	0
692.4	0	0	0
692.41	0	0	0
692.42	0	0	0
692.43	0	0	0
692.44	0	0	0
692.45	0	0	0
692.46	0	0	0
692.47	0	0	0
692.48	0	0	0
692.49	0	0	0
692.5	0	0	0
692.51	0	0	0
692.52	0	0	0
692.53	0	0	0
692.54	0	0	0
692.55	0	0	0
692.56	0	0	0
692.57	0	0	0
692.58	0	0	0
692.59	0	0	0
692.6	0	0	0
692.61	0	0	0
692.62	0	0	0
692.63	0	0	0
692.64	0	0	0
692.65	0	0	0
692.66	0	0	0
692.67	0	0	0
692.68	0	0	0
692.69	0	0	0
692.7	0	0	0
692.71	0	0	0
692.72	0	0	0
692.73	0	0	0
692.74	0	0	0
692.75	0	0	0
692.76	0	0	0
692.77	0	0	0
692.78	0	0	0
692.79	0	0	0
692.8	0	0	0
692.81	0	0	0
692.82	0	0	0
692.83	0	0	0
692.84	0	0	0
692.85	0	0	0
692.86	0	0	0
692.87	0	0	0
692.88	0	0	0
692.89	0	0	0
692.9	0	0	0
692.91	0	0	0
692.92	0	0	0
692.93	0	0	0
692.94	0	0	0
692.95	0	0	0
692.96	0	0	0
692.97	0	0	0
692.98	0	0	0
692.99	0	0	0
693	0	0	0
693.01	0	0	0
693.02	0	0	0
693.03	0	0	0
693.04	0	0	0
693.05	0	0	0
693.06	0	0	0
693.07	0	0	0
693.08	0	0	0
693.09	0	0	0
693.1	0	0	0
693.11	0	0	0
693.12	0	0	0
693.13	0	0	0
693.14	0	0	0
693.15	0	0	0
693.16	0	0	0
693.17	0	0	0
693.18	0	0	0
693.19	0	0	0
693.2	0	0	0
693.21	0	0	0
693.22	0	0	0
693.23	0	0	0
693.24	0	0	0
693.25	0	0	0
693.26	0	0	0
693.27	0	0	0
693.28	0	0	0
693.29	0	0	0
693.3	0	0	0
693.31	0	0	0
693.32	0	0	0
693.33	0	0	0
693.34	0	0	0
693.35	0	0	0
693.36	0	0	0
693.37	0	0	0
693.38	0	0	0
693.39	0	0	0
693.4	0	0	0
693.41	0	0	0
693.42	0	0	0
693.43	0	0	0
693.44	0	0	0
693.45	0	0	0
693.46	0	0	0
693.47	0	0	0
693.48	0	0	0
693.49	0	0	0
693.5	0	0	0
693.51	0	0	0
693.52	0	0	0
693.53	0	0	0
693.54	0	0	0
693.55	0	0	0
693.56	0	0	0
693.57	0	0	0
693.58	0	0	0
693.59	0	0	0
693.61	0	0	0
693.62	0	0	0
693.63	0	0	0
693.64	0	0	0
693.65	0	0	0
693.66	0	0	0
693.67	0	0	0
693.68	0	0	0
693.69	0	0	0
693.7	0	0	0
693.71	0	0	0
693.72	0	0	0
693.73	0	0	0
693.74	0	0	0
693.75	0	0	0
693.76	0	0	0
693.77	0	0	0
693.78	0	0	0
693.79	0	0	0
693.8	0	0	0
693.81	0	0	0
693.82	0	0	0
693.83	0	0	0
693.84	0	0	0
693.85	0	0	0
693.86	0	0	0
693.87	0	0	0
693.88	0	0	0
693.89	0	0	0
693.9	0	0	0
693.91	0	0	0
693.92	0	0	0
693.93	0	0	0
693.94	0	0	0
693.95	0	0	0
693.96	0	0	0
693.97	0	0	0
693.98	0	0	0
693.99	0	0	0
694	0	0	0
694.01	0	0	0
694.02	0	0	0
694.03	0	0	0
694.04	0	0	0
694.05	0	0	0
694.06	0	0	0
694.07	0	0	0
694.08	0	0	0
694.09	0	0	0
694.1	0	0	0
694.11	0	0	0
694.12	0	0	0
694.13	0	0	0
694.14	0	0	0
694.15	0	0	0
694.16	0	0	0
694.17	0	0	0
694.18	0	0	0
694.19	0	0	0
694.2	0	0	0
694.21	0	0	0
694.22	0	0	0
694.23	0	0	0
694.24	0	0	0
694.25	0	0	0
694.26	0	0	0
694.27	0	0	0
694.28	0	0	0
694.29	0	0	0
694.3	0	0	0
694.31	0	0	0
694.32	0	0	0
694.33	0	0	0
694.34	0	0	0
694.35	0	0	0
694.36	0	0	0
694.37	0	0	0
694.38	0	0	0
694.39	0	0	0
694.4	0	0	0
694.41	0	0	0
694.42	0	0	0
694.43	0	0	0
694.44	0	0	0
694.45	0	0	0
694.46	0	0	0
694.47	0	0	0
694.48	0	0	0
694.49	0	0	0
694.5	0	0	0
694.51	0	0	0
694.52	0	0	0
694.53	0	0	0
694.54	0	0	0
694.55	0	0	0
694.56	0	0	0
694.57	0	0	0
694.58	0	0	0
694.59	0	0	0
694.6	0	0	0
694.61	0	0	0
694.62	0	0	0
694.63	0	0	0
694.64	0	0	0
694.65	0	0	0
694.66	0	0	0
694.67	0	0	0
694.68	0	0	0
694.69	0	0	0
694.7	0	0	0
694.71	0	0	0
694.72	0	0	0
694.73	0	0	0
694.74	0	0	0
694.75	0	0	0
694.76	0	0	0
694.77	0	0	0
694.78	0	0	0
694.79	0	0	0
694.8	0	0	0
694.81	0	0	0
694.82	0	0	0
694.83	0	0	0
694.84	0	0	0
694.85	0	0	0
694.86	0	0	0
694.87	0	0	0
694.88	0	0	0
694.89	0	0	0
694.9	0	0	0
694.91	0	0	0
694.92	0	0	0
694.93	0	0	0
694.94	0	0	0
694.95	0	0	0
694.96	0	0	0
694.97	0	0	0
694.98	0	0	0
694.99	0	0	0
695	0	0	0
695.01	0	0	0
695.02	0	0	0
695.03	0	0	0
695.04	0	0	0
695.05	0	0	0
695.06	0	0	0
695.07	0	0	0
695.08	0	0	0
695.09	0	0	0
695.1	0	0	0
695.11	0	0	0
695.12	0	0	0
695.13	0	0	0
695.14	0	0	0
695.15	0	0	0
695.16	0	0	0
695.17	0	0	0
695.18	0	0	0
695.19	0	0	0
695.2	0	0	0
695.21	0	0	0
695.22	0	0	0
695.23	0	0	0
695.24	0	0	0
695.25	0	0	0
695.26	0	0	0
695.27	0	0	0
695.28	0	0	0
695.29	0	0	0
695.3	0	0	0
695.31	0	0	0
695.32	0	0	0
695.33	0	0	0
695.34	0	0	0
695.35	0	0	0
695.36	0	0	0
695.37	0	0	0
695.38	0	0	0
695.39	0	0	0
695.4	0	0	0
695.41	0	0	0
695.42	0	0	0
695.43	0	0	0
695.44	0	0	0
695.45	0	0	0
695.46	0	0	0
695.47	0	0	0
695.48	0	0	0
695.49	0	0	0
695.5	0	0	0
695.51	0	0	0
695.52	0	0	0
695.53	0	0	0
695.54	0	0	0
695.55	0	0	0
695.56	0	0	0
695.57	0	0	0
695.58	0	0	0
695.59	0	0	0
695.6	0	0	0
695.61	0	0	0
695.62	0	0	0
695.63	0	0	0
695.64	0	0	0
695.65	0	0	0
695.66	0	0	0
695.67	0	0	0
695.68	0	0	0
695.69	0	0	0
695.7	0	0	0
695.71	0	0	0
695.72	0	0	0
695.73	0	0	0
695.74	0	0	0
695.75	0	0	0
695.76	0	0	0
695.77	0	0	0
695.78	0	0	0
695.79	0	0	0
695.8	0	0	0
695.81	0	0	0
695.82	0	0	0
695.83	0	0	0
695.84	0	0	0
695.85	0	0	0
695.86	0	0	0
695.87	0	0	0
695.89	0	0	0
695.9	0	0	0
695.91	0	0	0
695.92	0	0	0
695.93	0	0	0
695.94	0	0	0
695.95	0	0	0
695.96	0	0	0
695.97	0	0	0
695.98	0	0	0
695.99	0	0	0
696	0	0	0
696.01	0	0	0
696.02	0	0	0
696.03	0	0	0
696.04	0	0	0
696.05	0	0	0
696.06	0	0	0
696.07	0	0	0
696.08	0	0	0
696.09	0	0	0
696.1	0	0	0
696.11	0	0	0
696.12	0	0	0
696.13	0	0	0
696.14	0	0	0
696.15	0	0	0
696.16	0	0	0
696.17	0	0	0
696.18	0	0	0
696.19	0	0	0
696.2	0	0	0
696.21	0	0	0
696.22	0	0	0
696.23	0	0	0
696.24	0	0	0
696.25	0	0	0
696.26	0	0	0
696.27	0	0	0
696.28	0	0	0
696.29	0	0	0
696.3	0	0	0
696.31	0	0	0
696.32	0	0	0
696.33	0	0	0
696.34	0	0	0
696.35	0	0	0
696.36	0	0	0
696.37	0	0	0
696.38	0	0	0
696.39	0	0	0
696.4	0	0	0
696.41	0	0	0
696.42	0	0	0
696.43	0	0	0
696.44	0	0	0
696.45	0	0	0
696.46	0	0	0
696.47	0	0	0
696.48	0	0	0
696.49	0	0	0
696.5	0	0	0
696.51	0	0	0
696.52	0	0	0
696.53	0	0	0
696.54	0	0	0
696.55	0	0	0
696.56	0	0	0
696.57	0	0	0
696.58	0	0	0
696.59	0	0	0
696.6	0	0	0
696.61	0	0	0
696.62	0	0	0
696.63	0	0	0
696.64	0	0	0
696.65	0	0	0
696.66	0	0	0
696.67	0	0	0
696.68	0	0	0
696.69	0	0	0
696.7	0	0	0
696.71	0	0	0
696.72	0	0	0
696.73	0	0	0
696.74	0	0	0
696.75	0	0	0
696.76	0	0	0
696.77	0	0	0
696.78	0	0	0
696.79	0	0	0
696.8	0	0	0
696.81	0	0	0
696.82	0	0	0
696.83	0	0	0
696.84	0	0	0
696.85	0	0	0
696.86	0	0	0
696.87	0	0	0
696.88	0	0	0
696.89	0	0	0
696.9	0	0	0
696.91	0	0	0
696.92	0	0	0
696.93	0	0	0
696.94	0	0	0
696.95	0	0	0
696.96	0	0	0
696.97	0	0	0
696.98	0	0	0
696.99	0	0	0
697	0	0	0
697.01	0	0	0
697.02	0	0	0
697.03	0	0	0
697.04	0	0	0
697.05	0	0	0
697.06	0	0	0
697.07	0	0	0
697.08	0	0	0
697.09	0	0	0
697.1	0	0	0
697.11	0	0	0
697.12	0	0	0
697.13	0	0	0
697.14	0	0	0
697.15	0	0	0
697.16	0	0	0
697.17	0	0	0
697.18	0	0	0
697.19	0	0	0
697.2	0	0	0
697.21	0	0	0
697.22	0	0	0
697.23	0	0	0
697.24	0	0	0
697.25	0	0	0
697.26	0	0	0
697.27	0	0	0
697.28	0	0	0
697.29	0	0	0
697.3	0	0	0
697.31	0	0	0
697.32	0	0	0
697.33	0	0	0
697.34	0	0	0
697.35	0	0	0
697.36	0	0	0
697.37	0	0	0
697.38	0	0	0
697.39	0	0	0
697.4	0	0	0
697.41	0	0	0
697.42	0	0	0
697.43	0	0	0
697.44	0	0	0
697.45	0	0	0
697.46	0	0	0
697.47	0	0	0
697.48	0	0	0
697.49	0	0	0
697.5	0	0	0
697.51	0	0	0
697.52	0	0	0
697.53	0	0	0
697.54	0	0	0
697.55	0	0	0
697.56	0	0	0
697.57	0	0	0
697.58	0	0	0
697.59	0	0	0
697.6	0	0	0
697.61	0	0	0
697.62	0	0	0
697.63	0	0	0
697.64	0	0	0
697.65	0	0	0
697.66	0	0	0
697.67	0	0	0
697.68	0	0	0
697.69	0	0	0
697.7	0	0	0
697.71	0	0	0
697.72	0	0	0
697.73	0	0	0
697.74	0	0	0
697.75	0	0	0
697.76	0	0	0
697.77	0	0	0
697.78	0	0	0
697.79	0	0	0
697.8	0	0	0
697.81	0	0	0
697.82	0	0	0
697.83	0	0	0
697.84	0	0	0
697.85	0	0	0
697.86	0	0	0
697.87	0	0	0
697.88	0	0	0
697.89	0	0	0
697.9	0	0	0
697.91	0	0	0
697.92	0	0	0
697.93	0	0	0
697.94	0	0	0
697.95	0	0	0
697.96	0	0	0
697.97	0	0	0
697.98	0	0	0
697.99	0	0	0
698	0	0	0
698.01	0	0	0
698.02	0	0	0
698.03	0	0	0
698.04	0	0	0
698.05	0	0	0
698.06	0	0	0
698.07	0	0	0
698.08	0	0	0
698.09	0	0	0
698.1	0	0	0
698.11	0	0	0
698.12	0	0	0
698.13	0	0	0
698.14	0	0	0
698.15	0	0	0
698.17	0	0	0
698.18	0	0	0
698.19	0	0	0
698.2	0	0	0
698.21	0	0	0
698.22	0	0	0
698.23	0	0	0
698.24	0	0	0
698.25	0	0	0
698.26	0	0	0
698.27	0	0	0
698.28	0	0	0
698.29	0	0	0
698.3	0	0	0
698.31	0	0	0
698.32	0	0	0
698.33	0	0	0
698.34	0	0	0
698.35	0	0	0
698.36	0	0	0
698.37	0	0	0
698.38	0	0	0
698.39	0	0	0
698.4	0	0	0
698.41	0	0	0
698.42	0	0	0
698.43	0	0	0
698.44	0	0	0
698.45	0	0	0
698.46	0	0	0
698.47	0	0	0
698.48	0	0	0
698.49	0	0	0
698.5	0	0	0
698.51	0	0	0
698.52	0	0	0
698.53	0	0	0
698.54	0	0	0
698.55	0	0	0
698.56	0	0	0
698.57	0	0	0
698.58	0	0	0
698.59	0	0	0
698.6	0	0	0
698.61	0	0	0
698.62	0	0	0
698.63	0	0	0
698.64	0	0	0
698.65	0	0	0
698.66	0	0	0
698.67	0	0	0
698.68	0	0	0
698.69	0	0	0
698.7	0	0	0
698.71	0	0	0
698.72	0	0	0
698.73	0	0	0
698.74	0	0	0
698.75	0	0	0
698.76	0	0	0
698.77	0	0	0
698.78	0	0	0
698.79	0	0	0
698.8	0	0	0
698.81	0	0	0
698.82	0	0	0
698.83	0	0	0
698.84	0	0	0
698.85	0	0	0
698.86	0	0	0
698.87	0	0	0
698.88	0	0	0
698.89	0	0	0
698.9	0	0	0
698.91	0	0	0
698.92	0	0	0
698.93	0	0	0
698.94	0	0	0
698.95	0	0	0
698.96	0	0	0
698.97	0	0	0
698.98	0	0	0
698.99	0	0	0
699	0	0	0
699.01	0	0	0
699.02	0	0	0
699.03	0	0	0
699.04	0	0	0
699.05	0	0	0
699.06	0	0	0
699.07	0	0	0
699.08	0	0	0
699.09	0	0	0
699.1	0	0	0
699.11	0	0	0
699.12	0	0	0
699.13	0	0	0
699.14	0	0	0
699.15	0	0	0
699.16	0	0	0
699.17	0	0	0
699.18	0	0	0
699.19	0	0	0
699.2	0	0	0
699.21	0	0	0
699.22	0	0	0
699.23	0	0	0
699.24	0	0	0
699.25	0	0	0
699.26	0	0	0
699.27	0	0	0
699.28	0	0	0
699.29	0	0	0
699.3	0	0	0
699.31	0	0	0
699.32	0	0	0
699.33	0	0	0
699.34	0	0	0
699.35	0	0	0
699.36	0	0	0
699.37	0	0	0
699.38	0	0	0
699.39	0	0	0
699.4	0	0	0
699.41	0	0	0
699.42	0	0	0
699.43	0	0	0
699.44	0	0	0
699.45	0	0	0
699.46	0	0	0
699.47	0	0	0
699.48	0	0	0
699.49	0	0	0
699.5	0	0	0
699.51	0	0	0
699.52	0	0	0
699.53	0	0	0
699.54	0	0	0
699.55	0	0	0
699.56	0	0	0
699.57	0	0	0
699.58	0	0	0
699.59	0	0	0
699.6	0	0	0
699.61	0	0	0
699.62	0	0	0
699.63	0	0	0
699.64	0	0	0
699.65	0	0	0
699.66	0	0	0
699.67	0	0	0
699.68	0	0	0
699.69	0	0	0
699.7	0	0	0
699.71	0	0	0
699.72	0	0	0
699.73	0	0	0
699.74	0	0	0
699.75	0	0	0
699.76	0	0	0
699.77	0	0	0
699.78	0	0	0
699.79	0	0	0
699.8	0	0	0
699.81	0	0	0
699.82	0	0	0
699.83	0	0	0
699.84	0	0	0
699.85	0	0	0
699.86	0	0	0
699.87	0	0	0
699.88	0	0	0
699.89	0	0	0
699.9	0	0	0
699.91	0	0	0
699.92	0	0	0
699.93	0	0	0
699.94	0	0	0
699.95	0	0	0
699.96	0	0	0
699.97	0	0	0
699.98	0	0	0
699.99	0	0	0
700	0	0	0
700.01	0	0	0
700.02	0	0	0
700.03	0	0	0
700.04	0	0	0
700.05	0	0	0
700.06	0	0	0
700.07	0	0	0
700.08	0	0	0
700.09	0	0	0
700.1	0	0	0
700.11	0	0	0
700.12	0	0	0
700.13	0	0	0
700.14	0	0	0
700.15	0	0	0
700.16	0	0	0
700.17	0	0	0
700.18	0	0	0
700.19	0	0	0
700.2	0	0	0
700.21	0	0	0
700.22	0	0	0
700.23	0	0	0
700.24	0	0	0
700.25	0	0	0
700.26	0	0	0
700.27	0	0	0
700.28	0	0	0
700.29	0	0	0
700.3	0	0	0
700.31	0	0	0
700.32	0	0	0
700.33	0	0	0
700.34	0	0	0
700.35	0	0	0
700.36	0	0	0
700.37	0	0	0
700.38	0	0	0
700.39	0	0	0
700.4	0	0	0
700.41	0	0	0
700.42	0	0	0
700.43	0	0	0
700.45	0	0	0
700.46	0	0	0
700.47	0	0	0
700.48	0	0	0
700.49	0	0	0
700.5	0	0	0
700.51	0	0	0
700.52	0	0	0
700.53	0	0	0
700.54	0	0	0
700.55	0	0	0
700.56	0	0	0
700.57	0	0	0
700.58	0	0	0
700.59	0	0	0
700.6	0	0	0
700.61	0	0	0
700.62	0	0	0
700.63	0	0	0
700.64	0	0	0
700.65	0	0	0
700.66	0	0	0
700.67	0	0	0
700.68	0	0	0
700.69	0	0	0
700.7	0	0	0
700.71	0	0	0
700.72	0	0	0
700.73	0	0	0
700.74	0	0	0
700.75	0	0	0
700.76	0	0	0
700.77	0	0	0
700.78	0	0	0
700.79	0	0	0
700.8	0	0	0
700.81	0	0	0
700.82	0	0	0
700.83	0	0	0
700.84	0	0	0
700.85	0	0	0
700.86	0	0	0
700.87	0	0	0
700.88	0	0	0
700.89	0	0	0
700.9	0	0	0
700.91	0	0	0
700.92	0	0	0
700.93	0	0	0
700.94	0	0	0
700.95	0	0	0
700.96	0	0	0
700.97	0	0	0
700.98	0	0	0
700.99	0	0	0
701	0	0	0
701.01	0	0	0
701.02	0	0	0
701.03	0	0	0
701.04	0	0	0
701.05	0	0	0
701.06	0	0	0
701.07	0	0	0
701.08	0	0	0
701.09	0	0	0
701.1	0	0	0
701.11	0	0	0
701.12	0	0	0
701.13	0	0	0
701.14	0	0	0
701.15	0	0	0
701.16	0	0	0
701.17	0	0	0
701.18	0	0	0
701.19	0	0	0
701.2	0	0	0
701.21	0	0	0
701.22	0	0	0
701.23	0	0	0
701.24	0	0	0
701.25	0	0	0
701.26	0	0	0
701.27	0	0	0
701.28	0	0	0
701.29	0	0	0
701.3	0	0	0
701.31	0	0	0
701.32	0	0	0
701.33	0	0	0
701.34	0	0	0
701.35	0	0	0
701.36	0	0	0
701.37	0	0	0
701.38	0	0	0
701.39	0	0	0
701.4	0	0	0
701.41	0	0	0
701.42	0	0	0
701.43	0	0	0
701.44	0	0	0
701.45	0	0	0
701.46	0	0	0
701.47	0	0	0
701.48	0	0	0
701.49	0	0	0
701.5	0	0	0
701.51	0	0	0
701.52	0	0	0
701.53	0	0	0
701.54	0	0	0
701.55	0	0	0
701.56	0	0	0
701.57	0	0	0
701.58	0	0	0
701.59	0	0	0
701.6	0	0	0
701.61	0	0	0
701.62	0	0	0
701.63	0	0	0
701.64	0	0	0
701.65	0	0	0
701.66	0	0	0
701.67	0	0	0
701.68	0	0	0
701.69	0	0	0
701.7	0	0	0
701.71	0	0	0
701.72	0	0	0
701.73	0	0	0
701.74	0	0	0
701.75	0	0	0
701.76	0	0	0
701.77	0	0	0
701.78	0	0	0
701.79	0	0	0
701.8	0	0	0
701.81	0	0	0
701.82	0	0	0
701.83	0	0	0
701.84	0	0	0
701.85	0	0	0
701.86	0	0	0
701.87	0	0	0
701.88	0	0	0
701.89	0	0	0
701.9	0	0	0
701.91	0	0	0
701.92	0	0	0
701.93	0	0	0
701.94	0	0	0
701.95	0	0	0
701.96	0	0	0
701.97	0	0	0
701.98	0	0	0
701.99	0	0	0
702	0	0	0
702.01	0	0	0
702.02	0	0	0
702.03	0	0	0
702.04	0	0	0
702.05	0	0	0
702.06	0	0	0
702.07	0	0	0
702.08	0	0	0
702.09	0	0	0
702.1	0	0	0
702.11	0	0	0
702.12	0	0	0
702.13	0	0	0
702.14	0	0	0
702.15	0	0	0
702.16	0	0	0
702.17	0	0	0
702.18	0	0	0
702.19	0	0	0
702.2	0	0	0
702.21	0	0	0
702.22	0	0	0
702.23	0	0	0
702.24	0	0	0
702.25	0	0	0
702.26	0	0	0
702.27	0	0	0
702.28	0	0	0
702.29	0	0	0
702.3	0	0	0
702.31	0	0	0
702.32	0	0	0
702.33	0	0	0
702.34	0	0	0
702.35	0	0	0
702.36	0	0	0
702.37	0	0	0
702.38	0	0	0
702.39	0	0	0
702.4	0	0	0
702.41	0	0	0
702.42	0	0	0
702.43	0	0	0
702.44	0	0	0
702.45	0	0	0
702.46	0	0	0
702.47	0	0	0
702.48	0	0	0
702.49	0	0	0
702.5	0	0	0
702.51	0	0	0
702.52	0	0	0
702.53	0	0	0
702.54	0	0	0
702.55	0	0	0
702.56	0	0	0
702.57	0	0	0
702.58	0	0	0
702.59	0	0	0
702.6	0	0	0
702.61	0	0	0
702.62	0	0	0
702.63	0	0	0
702.64	0	0	0
702.65	0	0	0
702.66	0	0	0
702.67	0	0	0
702.68	0	0	0
702.69	0	0	0
702.7	0	0	0
702.71	0	0	0
702.73	0	0	0
702.74	0	0	0
702.75	0	0	0
702.76	0	0	0
702.77	0	0	0
702.78	0	0	0
702.79	0	0	0
702.8	0	0	0
702.81	0	0	0
702.82	0	0	0
702.83	0	0	0
702.84	0	0	0
702.85	0	0	0
702.86	0	0	0
702.87	0	0	0
702.88	0	0	0
702.89	0	0	0
702.9	0	0	0
702.91	0	0	0
702.92	0	0	0
702.93	0	0	0
702.94	0	0	0
702.95	0	0	0
702.96	0	0	0
702.97	0	0	0
702.98	0	0	0
702.99	0	0	0
703	0	0	0
703.01	0	0	0
703.02	7.12018e-20	0	0
703.03	4.28326e-20	0	0
703.04	5.00286e-20	0	0
703.05	7.04118e-20	0	0
703.06	5.67825e-20	0	0
703.07	3.73647e-20	0	0
703.08	4.51041e-20	0	0
703.09	5.43573e-20	0	0
703.1	5.37544e-20	0	0
703.11	6.02177e-20	0	0
703.12	6.177e-20	0	0
703.13	5.00771e-20	0	0
703.14	4.9081e-20	0	0
703.15	5.48041e-20	0	0
703.16	4.32818e-20	0	0
703.17	3.53056e-20	0	0
703.18	5.36844e-20	0	0
703.19	7.16364e-20	0	0
703.2	7.38039e-20	0	0
703.21	7.77277e-20	0	0
703.22	7.34006e-20	0	0
703.23	4.91613e-20	0	0
703.24	4.13348e-20	0	0
703.25	6.15546e-20	0	0
703.26	6.28314e-20	0	0
703.27	3.93759e-20	0	0
703.28	4.30042e-20	0	0
703.29	7.46856e-20	0	0
703.3	8.44083e-20	0	0
703.31	6.8058e-20	0	0
703.32	5.89528e-20	0	0
703.33	6.21769e-20	0	0
703.34	6.83026e-20	0	0
703.35	7.78814e-20	0	0
703.36	8.0404e-20	0	0
703.37	6.42634e-20	0	0
703.38	4.61077e-20	0	0
703.39	4.53012e-20	0	0
703.4	5.34875e-20	0	0
703.41	5.78753e-20	0	0
703.42	6.12047e-20	0	0
703.43	6.72293e-20	0	0
703.44	7.34477e-20	0	0
703.45	7.67479e-20	0	0
703.46	7.48014e-20	0	0
703.47	6.94357e-20	0	0
703.48	6.32413e-20	0	0
703.49	5.3329e-20	0	0
703.5	4.49222e-20	0	0
703.51	5.06092e-20	0	0
703.52	6.05461e-20	0	0
703.53	5.46514e-20	0	0
703.54	4.40479e-20	0	0
703.55	4.40023e-20	0	0
703.56	3.89101e-20	0	0
703.57	2.96115e-20	0	0
703.58	4.17858e-20	0	0
703.59	5.72704e-20	0	0
703.6	4.63519e-20	0	0
703.61	4.98744e-20	0	0
703.62	9.25313e-20	0	0
703.63	1.07492e-19	0	0
703.64	7.41691e-20	0	0
703.65	7.22654e-20	0	0
703.66	1.04169e-19	0	0
703.67	9.26434e-20	0	0
703.68	6.51343e-20	0	0
703.69	8.6395e-20	0	0
703.7	9.94283e-20	0	0
703.71	6.16981e-20	0	0
703.72	5.24522e-20	0	0
703.73	8.5535e-20	0	0
703.74	7.92173e-20	0	0
703.75	5.3835e-20	0	0
703.76	7.6726e-20	0	0
703.77	9.22151e-20	0	0
703.78	5.86265e-20	0	0
703.79	5.7008e-20	0	0
703.8	9.86907e-20	0	0
703.81	9.42156e-20	0	0
703.82	6.20271e-20	0	0
703.83	7.95411e-20	0	0
703.84	1.02314e-19	0	0
703.85	6.98893e-20	0	0
703.86	4.02667e-20	0	0
703.87	5.77286e-20	0	0
703.88	7.85472e-20	0	0
703.89	7.84296e-20	0	0
703.9	7.29671e-20	0	0
703.91	6.34792e-20	0	0
703.92	5.76499e-20	0	0
703.93	6.56662e-20	0	0
703.94	6.94583e-20	0	0
703.95	6.5811e-20	0	0
703.96	7.86512e-20	0	0
703.97	9.45952e-20	0	0
703.98	8.83457e-20	0	0
703.99	8.11328e-20	0	0
704	8.87508e-20	0	0
704.01	9.24374e-20	0	0
704.02	9.55522e-20	0	0
704.03	1.07847e-19	0	0
704.04	1.05292e-19	0	0
704.05	8.64023e-20	0	0
704.06	8.22667e-20	0	0
704.07	8.53576e-20	0	0
704.08	7.79421e-20	0	0
704.09	8.25698e-20	0	0
704.1	9.77446e-20	0	0
704.11	8.86514e-20	0	0
704.12	7.19253e-20	0	0
704.13	7.92561e-20	0	0
704.14	8.48941e-20	0	0
704.15	7.44117e-20	0	0
704.16	7.7002e-20	0	0
704.17	8.36173e-20	0	0
704.18	7.34407e-20	0	0
704.19	7.96596e-20	0	0
704.2	1.06677e-19	0	0
704.21	1.02154e-19	0	0
704.22	7.77013e-20	0	0
704.23	8.93019e-20	0	0
704.24	1.10103e-19	0	0
704.25	9.2773e-20	0	0
704.26	7.15262e-20	0	0
704.27	7.71801e-20	0	0
704.28	8.52673e-20	0	0
704.29	9.22981e-20	0	0
704.3	1.0699e-19	0	0
704.31	1.02414e-19	0	0
704.32	7.84079e-20	0	0
704.33	7.75273e-20	0	0
704.34	9.50332e-20	0	0
704.35	9.49931e-20	0	0
704.36	8.85516e-20	0	0
704.37	9.34001e-20	0	0
704.38	9.15165e-20	0	0
704.39	8.12186e-20	0	0
704.4	7.95081e-20	0	0
704.41	8.0066e-20	0	0
704.42	8.03528e-20	0	0
704.43	9.26967e-20	0	0
704.44	1.03205e-19	0	0
704.45	9.73268e-20	0	0
704.46	9.8163e-20	0	0
704.47	1.14935e-19	0	0
704.48	1.19787e-19	0	0
704.49	1.06768e-19	0	0
704.5	9.62339e-20	0	0
704.51	9.44898e-20	0	0
704.52	1.0256e-19	0	0
704.53	1.18597e-19	0	0
704.54	1.207e-19	0	0
704.55	1.04406e-19	0	0
704.56	9.92314e-20	0	0
704.57	1.11954e-19	0	0
704.58	1.24919e-19	0	0
704.59	1.35177e-19	0	0
704.6	1.29294e-19	0	0
704.61	9.23561e-20	0	0
704.62	7.24335e-20	0	0
704.63	1.09462e-19	0	0
704.64	1.34772e-19	0	0
704.65	9.61136e-20	0	0
704.66	7.15984e-20	0	0
704.67	1.14307e-19	0	0
704.68	1.48429e-19	0	0
704.69	1.25778e-19	0	0
704.7	9.65024e-20	0	0
704.71	9.21263e-20	0	0
704.72	9.48046e-20	0	0
704.73	9.76757e-20	0	0
704.74	9.62677e-20	0	0
704.75	8.71901e-20	0	0
704.76	9.20953e-20	0	0
704.77	1.11463e-19	0	0
704.78	1.13707e-19	0	0
704.79	1.07364e-19	0	0
704.8	1.19849e-19	0	0
704.81	1.27379e-19	0	0
704.82	1.14308e-19	0	0
704.83	1.14177e-19	0	0
704.84	1.23242e-19	0	0
704.85	1.0418e-19	0	0
704.86	8.32592e-20	0	0
704.87	9.95618e-20	0	0
704.88	1.22094e-19	0	0
704.89	1.24361e-19	0	0
704.9	1.31902e-19	0	0
704.91	1.38838e-19	0	0
704.92	1.16115e-19	0	0
704.93	9.3937e-20	0	0
704.94	1.10358e-19	0	0
704.95	1.34077e-19	0	0
704.96	1.24485e-19	0	0
704.97	9.92833e-20	0	0
704.98	9.23867e-20	0	0
705	1.06351e-19	0	0
705.01	1.15987e-19	0	0
705.02	1.02432e-19	0	0
705.03	8.69024e-20	0	0
705.04	1.0121e-19	0	0
705.05	1.25044e-19	0	0
705.06	1.22985e-19	0	0
705.07	1.19793e-19	0	0
705.08	1.46382e-19	0	0
705.09	1.61982e-19	0	0
705.1	1.31684e-19	0	0
705.11	1.04186e-19	0	0
705.12	1.22874e-19	0	0
705.13	1.45964e-19	0	0
705.14	1.2811e-19	0	0
705.15	1.03669e-19	0	0
705.16	1.14805e-19	0	0
705.17	1.3612e-19	0	0
705.18	1.32669e-19	0	0
705.19	1.26425e-19	0	0
705.2	1.41493e-19	0	0
705.21	1.49525e-19	0	0
705.22	1.31869e-19	0	0
705.23	1.22495e-19	0	0
705.24	1.38684e-19	0	0
705.25	1.50719e-19	0	0
705.26	1.46362e-19	0	0
705.27	1.40331e-19	0	0
705.28	1.31923e-19	0	0
705.29	1.25777e-19	0	0
705.3	1.40977e-19	0	0
705.31	1.56075e-19	0	0
705.32	1.34286e-19	0	0
705.33	1.05459e-19	0	0
705.34	1.16696e-19	0	0
705.35	1.41705e-19	0	0
705.36	1.37846e-19	0	0
705.37	1.23219e-19	0	0
705.38	1.23318e-19	0	0
705.39	1.28211e-19	0	0
705.4	1.30295e-19	0	0
705.41	1.32628e-19	0	0
705.42	1.33379e-19	0	0
705.43	1.39067e-19	0	0
705.44	1.51116e-19	0	0
705.45	1.4832e-19	0	0
705.46	1.30144e-19	0	0
705.47	1.23545e-19	0	0
705.48	1.23643e-19	0	0
705.49	1.12402e-19	0	0
705.5	1.15457e-19	0	0
705.51	1.46057e-19	0	0
705.52	1.58252e-19	0	0
705.53	1.34682e-19	0	0
705.54	1.21312e-19	0	0
705.55	1.32924e-19	0	0
705.56	1.37429e-19	0	0
705.57	1.34686e-19	0	0
705.58	1.46005e-19	0	0
705.59	1.59354e-19	0	0
705.6	1.59919e-19	0	0
705.61	1.56947e-19	0	0
705.62	1.48832e-19	0	0
705.63	1.28645e-19	0	0
705.64	1.1684e-19	0	0
705.65	1.28096e-19	0	0
705.66	1.40474e-19	0	0
705.67	1.36647e-19	0	0
705.68	1.32277e-19	0	0
705.69	1.42065e-19	0	0
705.7	1.55883e-19	0	0
705.71	1.58789e-19	0	0
705.72	1.51208e-19	0	0
705.73	1.43633e-19	0	0
705.74	1.4209e-19	0	0
705.75	1.44116e-19	0	0
705.76	1.44469e-19	0	0
705.77	1.36425e-19	0	0
705.78	1.22463e-19	0	0
705.79	1.26923e-19	0	0
705.8	1.60663e-19	0	0
705.81	1.84465e-19	0	0
705.82	1.69261e-19	0	0
705.83	1.55085e-19	0	0
705.84	1.69394e-19	0	0
705.85	1.67642e-19	0	0
705.86	1.36217e-19	0	0
705.87	1.34294e-19	0	0
705.88	1.64305e-19	0	0
705.89	1.56817e-19	0	0
705.9	1.15986e-19	0	0
705.91	1.10587e-19	0	0
705.92	1.34816e-19	0	0
705.93	1.38142e-19	0	0
705.94	1.38522e-19	0	0
705.95	1.67647e-19	0	0
705.96	1.89933e-19	0	0
705.97	1.76318e-19	0	0
705.98	1.63853e-19	0	0
705.99	1.76391e-19	0	0
706	1.79002e-19	0	0
706.01	1.51242e-19	0	0
706.02	1.31259e-19	0	0
706.03	1.50444e-19	0	0
706.04	1.74278e-19	0	0
706.05	1.59147e-19	0	0
706.06	1.33624e-19	0	0
706.07	1.47724e-19	0	0
706.08	1.72973e-19	0	0
706.09	1.5859e-19	0	0
706.1	1.37807e-19	0	0
706.11	1.61329e-19	0	0
706.12	1.92223e-19	0	0
706.13	1.83733e-19	0	0
706.14	1.64316e-19	0	0
706.15	1.60375e-19	0	0
706.16	1.49705e-19	0	0
706.17	1.38874e-19	0	0
706.18	1.58932e-19	0	0
706.19	1.85163e-19	0	0
706.2	1.78163e-19	0	0
706.21	1.61918e-19	0	0
706.22	1.67571e-19	0	0
706.23	1.73093e-19	0	0
706.24	1.60691e-19	0	0
706.25	1.52192e-19	0	0
706.26	1.57769e-19	0	0
706.27	1.62253e-19	0	0
706.28	1.62075e-19	0	0
706.29	1.64903e-19	0	0
706.3	1.70203e-19	0	0
706.31	1.75811e-19	0	0
706.32	1.81305e-19	0	0
706.33	1.81592e-19	0	0
706.34	1.74617e-19	0	0
706.35	1.65922e-19	0	0
706.36	1.60674e-19	0	0
706.37	1.61273e-19	0	0
706.38	1.68834e-19	0	0
706.39	1.81643e-19	0	0
706.4	1.93453e-19	0	0
706.41	1.93589e-19	0	0
706.42	1.7837e-19	0	0
706.43	1.64666e-19	0	0
706.44	1.68327e-19	0	0
706.45	1.71616e-19	0	0
706.46	1.56687e-19	0	0
706.47	1.51155e-19	0	0
706.48	1.7518e-19	0	0
706.49	1.8949e-19	0	0
706.5	1.70553e-19	0	0
706.51	1.62218e-19	0	0
706.52	1.86556e-19	0	0
706.53	1.98926e-19	0	0
706.54	1.82438e-19	0	0
706.55	1.73109e-19	0	0
706.56	1.77297e-19	0	0
706.57	1.70203e-19	0	0
706.58	1.59771e-19	0	0
706.59	1.63305e-19	0	0
706.6	1.69873e-19	0	0
706.61	1.75218e-19	0	0
706.62	1.89965e-19	0	0
706.63	2.04099e-19	0	0
706.64	2.05215e-19	0	0
706.65	2.0079e-19	0	0
706.66	1.87939e-19	0	0
706.67	1.64408e-19	0	0
706.68	1.59725e-19	0	0
706.69	1.81963e-19	0	0
706.7	1.87899e-19	0	0
706.71	1.67093e-19	0	0
706.72	1.6594e-19	0	0
706.73	1.9101e-19	0	0
706.74	1.97734e-19	0	0
706.75	1.79043e-19	0	0
706.76	1.65621e-19	0	0
706.77	1.6775e-19	0	0
706.78	1.82843e-19	0	0
706.79	2.04066e-19	0	0
706.8	2.05813e-19	0	0
706.81	1.83981e-19	0	0
706.82	1.77197e-19	0	0
706.83	1.95507e-19	0	0
706.84	2.01118e-19	0	0
706.85	1.83805e-19	0	0
706.86	1.74091e-19	0	0
706.87	1.85587e-19	0	0
706.88	2.04598e-19	0	0
706.89	2.10675e-19	0	0
706.9	1.91761e-19	0	0
706.91	1.7343e-19	0	0
706.92	1.90491e-19	0	0
706.93	2.12431e-19	0	0
706.94	1.93333e-19	0	0
706.95	1.69278e-19	0	0
706.96	1.84884e-19	0	0
706.97	2.0023e-19	0	0
706.98	1.8885e-19	0	0
706.99	1.90803e-19	0	0
707	2.03734e-19	0	0
707.01	1.89025e-19	0	0
707.02	1.80246e-19	0	0
707.03	2.09735e-19	0	0
707.04	2.20804e-19	0	0
707.05	1.91484e-19	0	0
707.06	1.83676e-19	0	0
707.07	1.99263e-19	0	0
707.08	1.84511e-19	0	0
707.09	1.65625e-19	0	0
707.1	1.83781e-19	0	0
707.11	1.93926e-19	0	0
707.12	1.73313e-19	0	0
707.13	1.76473e-19	0	0
707.14	2.08735e-19	0	0
707.15	2.15174e-19	0	0
707.16	1.95195e-19	0	0
707.17	1.85391e-19	0	0
707.18	1.89129e-19	0	0
707.19	2.00089e-19	0	0
707.2	2.10813e-19	0	0
707.21	2.0157e-19	0	0
707.22	1.88442e-19	0	0
707.23	2.05437e-19	0	0
707.24	2.22254e-19	0	0
707.25	1.9791e-19	0	0
707.26	1.73029e-19	0	0
707.28	1.85389e-19	0	0
707.29	1.97733e-19	0	0
707.3	1.93621e-19	0	0
707.31	2.01427e-19	0	0
707.32	2.05582e-19	0	0
707.33	1.86291e-19	0	0
707.34	1.86552e-19	0	0
707.35	2.13311e-19	0	0
707.36	2.05994e-19	0	0
707.37	1.75047e-19	0	0
707.38	1.91815e-19	0	0
707.39	2.3134e-19	0	0
707.4	2.19437e-19	0	0
707.41	1.83828e-19	0	0
707.42	1.89383e-19	0	0
707.43	2.14346e-19	0	0
707.44	2.17332e-19	0	0
707.45	2.11332e-19	0	0
707.46	2.09683e-19	0	0
707.47	2.08294e-19	0	0
707.48	2.19398e-19	0	0
707.49	2.36404e-19	0	0
707.5	2.23172e-19	0	0
707.51	1.9091e-19	0	0
707.52	1.89548e-19	0	0
707.53	2.13224e-19	0	0
707.54	2.18563e-19	0	0
707.55	2.0563e-19	0	0
707.56	1.93493e-19	0	0
707.57	1.77323e-19	0	0
707.58	1.67155e-19	0	0
707.59	1.83595e-19	0	0
707.6	2.02082e-19	0	0
707.61	1.94491e-19	0	0
707.62	1.87369e-19	0	0
707.63	2.02515e-19	0	0
707.64	2.1339e-19	0	0
707.65	2.11557e-19	0	0
707.66	2.18921e-19	0	0
707.67	2.25731e-19	0	0
707.68	2.1329e-19	0	0
707.69	2.03211e-19	0	0
707.7	2.08081e-19	0	0
707.71	2.04405e-19	0	0
707.72	1.96487e-19	0	0
707.73	2.1047e-19	0	0
707.74	2.26503e-19	0	0
707.75	2.18283e-19	0	0
707.76	2.12844e-19	0	0
707.77	2.29686e-19	0	0
707.78	2.39945e-19	0	0
707.79	2.34847e-19	0	0
707.8	2.39715e-19	0	0
707.81	2.4826e-19	0	0
707.82	2.34446e-19	0	0
707.83	2.10115e-19	0	0
707.84	2.02616e-19	0	0
707.85	2.09529e-19	0	0
707.86	2.15409e-19	0	0
707.87	2.17916e-19	0	0
707.88	2.24111e-19	0	0
707.89	2.34798e-19	0	0
707.9	2.34097e-19	0	0
707.91	2.14104e-19	0	0
707.92	2.05614e-19	0	0
707.93	2.30674e-19	0	0
707.94	2.50586e-19	0	0
707.95	2.34499e-19	0	0
707.96	2.20083e-19	0	0
707.97	2.2962e-19	0	0
707.98	2.25672e-19	0	0
707.99	2.05429e-19	0	0
708	2.13769e-19	0	0
708.01	2.38657e-19	0	0
708.02	2.29136e-19	0	0
708.03	1.99398e-19	0	0
708.04	1.9414e-19	0	0
708.05	2.04554e-19	0	0
708.06	2.12008e-19	0	0
708.07	2.27296e-19	0	0
708.08	2.3773e-19	0	0
708.09	2.16224e-19	0	0
708.1	1.9188e-19	0	0
708.11	2.12392e-19	0	0
708.12	2.53118e-19	0	0
708.13	2.50629e-19	0	0
708.14	2.0855e-19	0	0
708.15	1.9215e-19	0	0
708.16	2.22145e-19	0	0
708.17	2.46429e-19	0	0
708.18	2.30919e-19	0	0
708.19	2.07903e-19	0	0
708.2	2.05643e-19	0	0
708.21	2.07522e-19	0	0
708.22	2.08085e-19	0	0
708.23	2.23177e-19	0	0
708.24	2.35861e-19	0	0
708.25	2.23919e-19	0	0
708.26	2.15714e-19	0	0
708.27	2.33209e-19	0	0
708.28	2.42626e-19	0	0
708.29	2.26853e-19	0	0
708.3	2.20743e-19	0	0
708.31	2.39593e-19	0	0
708.32	2.5846e-19	0	0
708.33	2.63134e-19	0	0
708.34	2.56063e-19	0	0
708.35	2.40144e-19	0	0
708.36	2.27654e-19	0	0
708.37	2.29011e-19	0	0
708.38	2.34917e-19	0	0
708.39	2.3458e-19	0	0
708.4	2.2611e-19	0	0
708.41	2.12012e-19	0	0
708.42	2.09522e-19	0	0
708.43	2.27804e-19	0	0
708.44	2.36863e-19	0	0
708.45	2.21825e-19	0	0
708.46	2.2158e-19	0	0
708.47	2.44834e-19	0	0
708.48	2.41221e-19	0	0
708.49	2.11974e-19	0	0
708.5	2.16049e-19	0	0
708.51	2.47565e-19	0	0
708.52	2.56265e-19	0	0
708.53	2.50873e-19	0	0
708.54	2.49316e-19	0	0
708.55	2.20735e-19	0	0
708.56	1.81312e-19	0	0
708.57	2.02314e-19	0	0
708.58	2.6026e-19	0	0
708.59	2.62868e-19	0	0
708.6	2.23375e-19	0	0
708.61	2.24527e-19	0	0
708.62	2.51001e-19	0	0
708.63	2.37419e-19	0	0
708.64	2.10938e-19	0	0
708.65	2.21124e-19	0	0
708.66	2.31749e-19	0	0
708.67	2.09533e-19	0	0
708.68	2.01603e-19	0	0
708.69	2.29907e-19	0	0
708.7	2.4555e-19	0	0
708.71	2.34903e-19	0	0
708.72	2.37412e-19	0	0
708.73	2.48538e-19	0	0
708.74	2.45496e-19	0	0
708.75	2.56746e-19	0	0
708.76	2.83558e-19	0	0
708.77	2.6256e-19	0	0
708.78	2.03804e-19	0	0
708.79	1.97175e-19	0	0
708.8	2.35153e-19	0	0
708.81	2.33062e-19	0	0
708.82	2.11308e-19	0	0
708.83	2.40611e-19	0	0
708.84	2.76463e-19	0	0
708.85	2.53078e-19	0	0
708.86	2.23116e-19	0	0
708.87	2.36567e-19	0	0
708.88	2.43553e-19	0	0
708.89	2.18645e-19	0	0
708.9	2.08393e-19	0	0
708.91	2.23093e-19	0	0
708.92	2.29348e-19	0	0
708.93	2.28906e-19	0	0
708.94	2.34466e-19	0	0
708.95	2.32476e-19	0	0
708.96	2.25559e-19	0	0
708.97	2.32784e-19	0	0
708.98	2.45599e-19	0	0
708.99	2.49365e-19	0	0
709	2.49341e-19	0	0
709.01	2.41236e-19	0	0
709.02	2.18865e-19	0	0
709.03	2.0931e-19	0	0
709.04	2.34239e-19	0	0
709.05	2.64234e-19	0	0
709.06	2.64027e-19	0	0
709.07	2.45025e-19	0	0
709.08	2.35081e-19	0	0
709.09	2.37488e-19	0	0
709.1	2.38174e-19	0	0
709.11	2.31841e-19	0	0
709.12	2.3059e-19	0	0
709.13	2.44394e-19	0	0
709.14	2.59216e-19	0	0
709.15	2.5455e-19	0	0
709.16	2.34884e-19	0	0
709.17	2.16821e-19	0	0
709.18	2.03345e-19	0	0
709.19	1.96433e-19	0	0
709.2	2.08019e-19	0	0
709.21	2.38459e-19	0	0
709.22	2.62931e-19	0	0
709.23	2.55629e-19	0	0
709.24	2.22248e-19	0	0
709.25	1.94963e-19	0	0
709.26	1.95095e-19	0	0
709.27	2.13674e-19	0	0
709.28	2.35503e-19	0	0
709.29	2.51689e-19	0	0
709.3	2.51418e-19	0	0
709.31	2.36422e-19	0	0
709.32	2.24427e-19	0	0
709.33	2.14406e-19	0	0
709.34	1.9311e-19	0	0
709.35	1.85157e-19	0	0
709.36	2.20038e-19	0	0
709.37	2.60806e-19	0	0
709.38	2.57353e-19	0	0
709.39	2.27682e-19	0	0
709.4	2.08613e-19	0	0
709.41	2.01612e-19	0	0
709.42	2.10309e-19	0	0
709.43	2.38061e-19	0	0
709.44	2.51311e-19	0	0
709.45	2.32806e-19	0	0
709.46	2.18213e-19	0	0
709.47	2.24707e-19	0	0
709.48	2.23373e-19	0	0
709.49	2.11385e-19	0	0
709.5	2.17128e-19	0	0
709.51	2.37253e-19	0	0
709.52	2.43935e-19	0	0
709.53	2.33467e-19	0	0
709.54	2.23924e-19	0	0
709.56	2.25016e-19	0	0
709.57	2.25855e-19	0	0
709.58	2.1252e-19	0	0
709.59	2.01193e-19	0	0
709.6	2.18327e-19	0	0
709.61	2.44499e-19	0	0
709.62	2.43321e-19	0	0
709.63	2.28962e-19	0	0
709.64	2.26532e-19	0	0
709.65	2.22107e-19	0	0
709.66	2.15666e-19	0	0
709.67	2.32225e-19	0	0
709.68	2.52506e-19	0	0
709.69	2.41395e-19	0	0
709.7	2.20948e-19	0	0
709.71	2.1569e-19	0	0
709.72	2.04181e-19	0	0
709.73	1.92912e-19	0	0
709.74	2.16442e-19	0	0
709.75	2.43944e-19	0	0
709.76	2.24454e-19	0	0
709.77	1.94001e-19	0	0
709.78	2.0605e-19	0	0
709.79	2.27271e-19	0	0
709.8	2.14427e-19	0	0
709.81	1.97954e-19	0	0
709.82	2.11555e-19	0	0
709.83	2.26242e-19	0	0
709.84	2.10771e-19	0	0
709.85	1.90112e-19	0	0
709.86	1.95907e-19	0	0
709.87	2.09729e-19	0	0
709.88	2.04975e-19	0	0
709.89	2.0528e-19	0	0
709.9	2.31816e-19	0	0
709.91	2.43452e-19	0	0
709.92	2.14834e-19	0	0
709.93	1.95694e-19	0	0
709.94	2.0863e-19	0	0
709.95	2.06276e-19	0	0
709.96	1.88403e-19	0	0
709.97	2.0911e-19	0	0
709.98	2.45737e-19	0	0
709.99	2.29677e-19	0	0
710	1.88043e-19	0	0
710.01	1.83227e-19	0	0
710.02	1.99448e-19	0	0
710.03	2.05258e-19	0	0
710.04	2.15981e-19	0	0
710.05	2.26147e-19	0	0
710.06	2.09099e-19	0	0
710.07	1.89681e-19	0	0
[truncated: 101,545 more rows]
